# Supplementary material for: Digital photography for assessing the link between vegetation phenology andCO 2 exchange in two contrasting northern ecosystems
Source: Copernicus journal article supplement (doi:10.5194/gi-5-417-2016), 2016-09-12
Supplement: Supplementary file 2 [file gi-5-417-2016-supplement.zip]

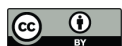

## *Supplement of*

# **Digital photography for assessing the link between vegetation phenology and CO<sub>2</sub> exchange in two contrasting northern ecosystems**

**Maiju Linkosalmi et al.**

*Correspondence to:* Maiju Linkosalmi (maiju.linkosalmi@fmi.fi)

- gi-5-417-2016-supplement-title-page.pdf
- Data (Linkosalmi et al.).xlsx
- Linkosalmi Digital photography.pdf

The copyright of individual parts of the supplement might differ from the CC-BY 3.0 licence.
